# Supplementary material for: Extraction of Lycopene from Tomato Using Hydrophobic Natural Deep Eutectic Solvents Based on Terpenes and Fatty Acids
Source: Foods. 2022 Aug 31;11(17):2645. doi: 10.3390/foods11172645 (PMC9455282; doi:10.3390/foods11172645)
Supplement: Supplementary file 1 [file foods-11-02645-s001.zip › foods-1834301-supplementary.pdf]

## Supplementary Material

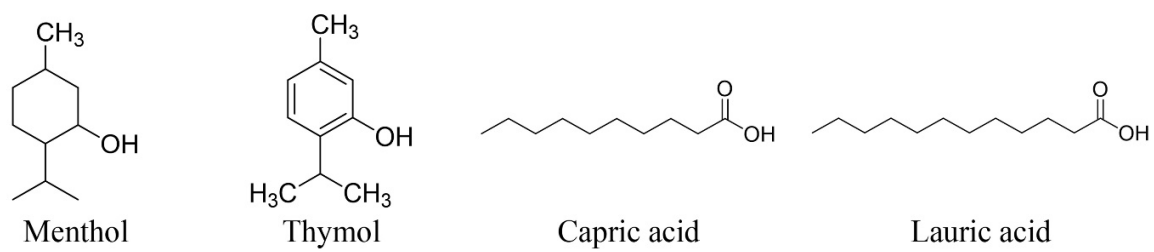

**Figure S1.** Chemical structures of menthol, thymol, capric acid and lauric acid.

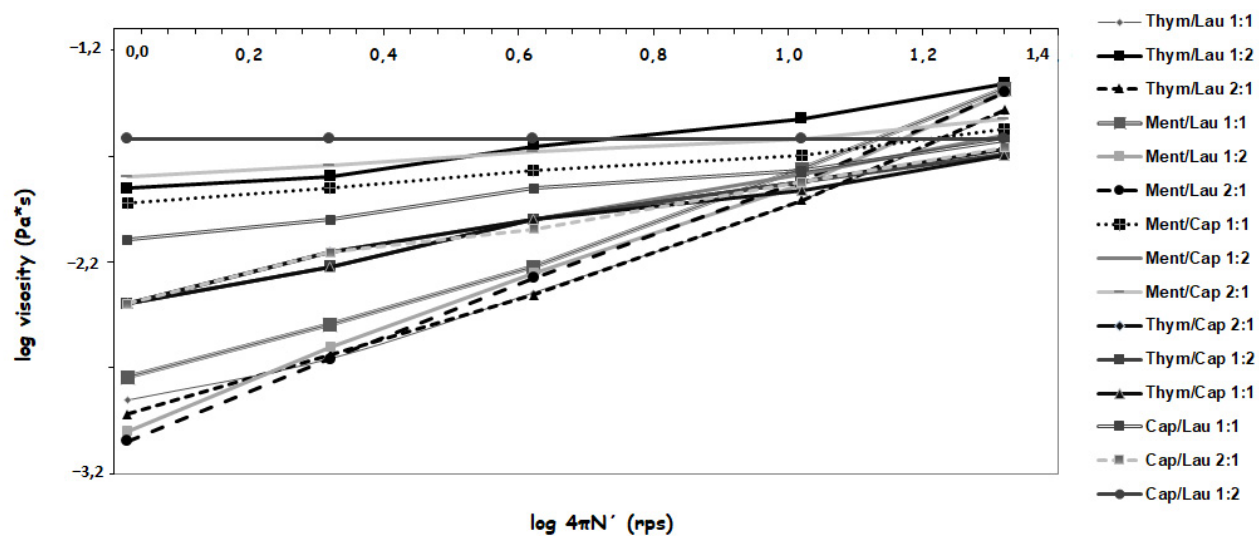

Figure S2. Effect of shear rate on apparent viscosity of the prepared HNADESs.

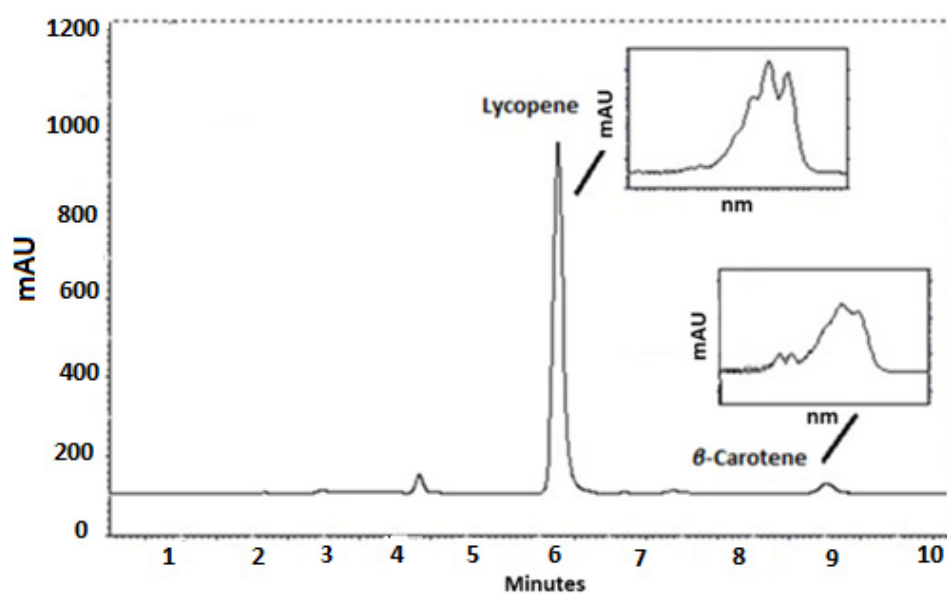

**Figure S3.** RP-HPLC-DAD chromatogram at 473 nm of a tomato extract prepared with Cap/Lau 1:2 eutectic mixture (the UV spectra corresponding to the peaks attributed to lycopene and  $\beta$ -carotene, respectively, are shown as inserts).

**Table S1.** Analysis of variance of lycopene content (mg/100 g fresh weight) values.

| Source                                           |             | F-value <sup>a</sup> | P-value |
|--------------------------------------------------|-------------|----------------------|---------|
| mg lycopene/100 g fresh weight ( $R^2 = 0.855$ ) |             |                      |         |
| Regression                                       |             | 8.24                 | 0.008   |
|                                                  | Linear      | 7.42                 | 0.019   |
|                                                  | Square      | 19.73                | 0.001   |
|                                                  | Interaction | 0.10                 | 0.760   |
| Lack of fit                                      |             | 1.39                 | 0.366   |

<sup>a</sup>F-test values are significant at the 5% level.

**Table S2.** Estimated regression coefficients and significance (*P*) values for lycopene content (mg/100 g fresh weight) after using coded values of factors.

| Term                                            | Coefficient | <i>P</i> -value |
|-------------------------------------------------|-------------|-----------------|
| mg lycopene/100 g fresh weight                  |             |                 |
| Constant                                        | -4.9308     | 0.240           |
| Duration of extraction                          | 0.2081      | 0.066           |
| Solvent:solid ratio                             | 0.1897      | 0.007           |
| Duration of extraction x Duration of extraction | -0.0019     | 0.033           |
| Solvent:solid ratio x Solvent:solid ratio       | -0.0015     | 0.001           |
| Duration of extraction x Solvent:solid ratio    | 0.0002      | 0.760           |
